# Supplementary material for: Monitoring of Intracellular Tau Aggregation Regulated by OGA/OGT Inhibitors
Source: MDPI journal article supplement (doi:10.3390/ijms160920212), 2015-08-26
Supplement: s1 [file s1]

## Supplementary Information

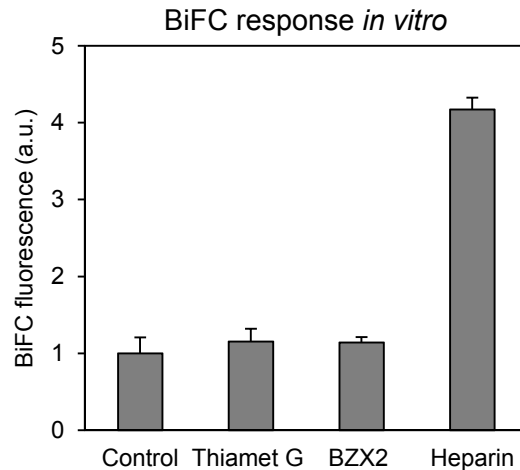

**Figure S1.** OGA/OGT (*O*-GlcNAcase/*O*-GlcNAc transferase) inhibitor do not directly regulate purified tau aggregation *in vitro*. Tau-BiFC cell lysates (0.4 mg/mL) was incubated with Thiamet G or BZX2 (0.1 mg/mL). After 48 h, BiFC fluorescence intensity was quantified by microplate reader ( $\lambda_{\text{ex}} = 430 \text{ nm}$ ;  $\lambda_{\text{em}} = 525 \text{ nm}$ ).  $p > 0.05$ .

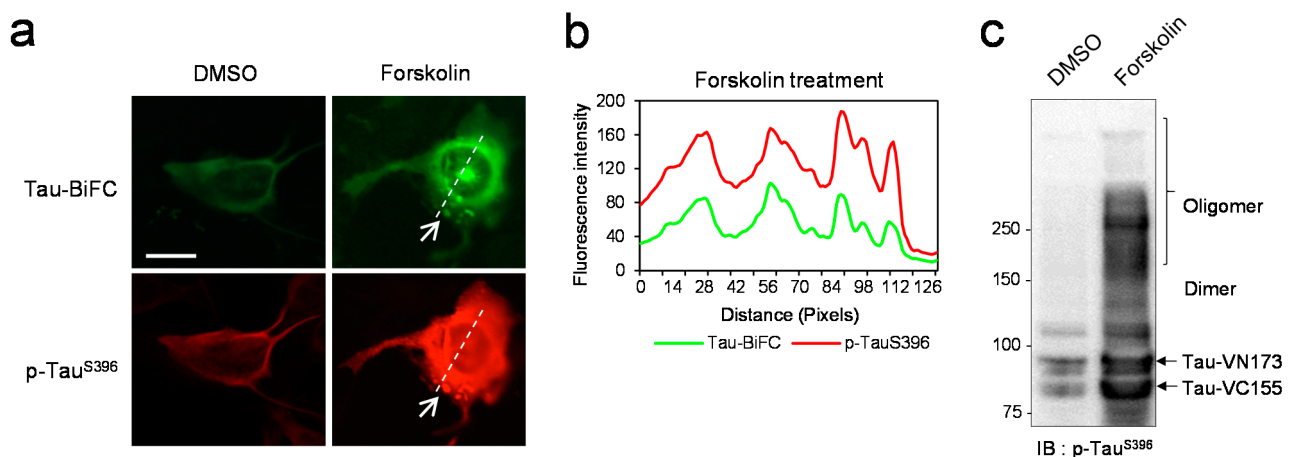

**Figure S2.** Intracellular tau oligomerization and aggregation were showed by native gel analysis and immune-fluorescence microscopy. **(a)** Confocal microscopy images of Tau-BiFC clearly showed the formation of tau aggregates (arrows) induced by forskolin (90  $\mu\text{M}$ ). Most of the tau aggregates were co-localized with tau stained with anti-phospho-Ser396 antibody. Scale bar = 50  $\mu\text{m}$ ; **(b)** Correlation graph between tau phosphorylation and tau aggregation. Fluorescence intensities of tau-BiFC cell according to the distance (Pixels, dotted line in **(a)**) were quantified by ImageJ software (Version 1.48, National Institutes of Health, Bethesda, MD, USA); and **(c)** Native gel analysis visualized the formation of tau oligomers induced by forskolin. Under basal condition, only two bands of tau-BiFC fragments are visible at 76 and 85 kDa. Upon the treatment of forskolin, ladders of tau dimers and oligomers appeared in the range of 150–300 kDa.

## 1. Supplementary Methods

### 1.1. Quantification of Tau-BiFC Response *in Vitro*

To quantify tau-BiFC response by Thiamet G and BZX2 *in vitro*, tau-BiFC cell lysates were prepared by using CelLytic M (Sigma, St. Louis, MO, USA) containing protease and phosphatase inhibitor cocktail (Sigma). 0.4 mg/mL of tau-BiFC cell lysates were incubated with Thiamet G (0.01 mg/mL) or BZX2 (0.01 mg/mL) or Heparin (0.01 mg/mL). After 48 h, 40  $\mu$ L tau-BiFC cell lysates were transferred to a black 384-well plate and the BiFC fluorescence signal was measured at excitation wavelength of 430 nm in Flexstation2 spectrophotometer (Molecular Devices, Sunnyvale, CA, USA).

### 1.2. Immunofluorescence Analysis

To detect tau phosphorylation in tau-BiFC cells, the cells were fixed in 3.7% formaldehyde (Sigma) after 48 h of forskolin treatment. Then, the fixed cells were incubated in PBS containing 0.1% triton-X for permeabilization followed by PBS wash. The tau-BiFC cells underwent blocking step with 4% BSA for 1 h, and incubated with primary phospho-tau Ser396 antibody (1:500, Abcam, Cambridge, MA, USA) overnight at 4 °C. Next day, tau-BiFC cells were stained with Alexa Fluor 633-conjugated secondary antibodies (1:1000, Abcam). Images were obtained by confocal microscopy.
